# Supplementary material for: Nano ordered polyacrylonitrile-grafted chitosan as a robust biopolymeric catalyst for efficient synthesis of highly substituted pyrrole derivatives
Source: Research Square preprint supplement (doi:10.21203/rs.3.rs-5782484/v1), 2025-04-17

# Electronic Supporting Information

## Nano ordered polyacrylonitrile-grafted chitosan as a robust bio-based catalyst for efficient synthesis of highly substituted pyrrole derivatives

Mahsa Zohrevand,<sup>a</sup> Mohammad G. Dekamin,<sup>\*a</sup> Niloufar Nashibi,<sup>\*a</sup> Afshin Sarvary<sup>b</sup>

<sup>a</sup>Pharmaceutical and Heterocyclic Compounds Research Laboratory, Department of Chemistry, Iran University of Science and Technology, Tehran 16846-13114, Iran. Email: [mdekamin@iust.ac.ir](mailto:mdekamin@iust.ac.ir).

<sup>b</sup>Department of Chemistry, Babol Noshirvani University of Technology, Babol 4714873113, Iran. Email: [asarvary61@gmail.com](mailto:asarvary61@gmail.com).

| content                                                                                                                                                                    | Title      |
|----------------------------------------------------------------------------------------------------------------------------------------------------------------------------|------------|
| <b>Title page</b>                                                                                                                                                          |            |
| <b>Figure S1</b> The chemical structure of selected examples of pharmacologically-active pyrrole derivatives.                                                              | <b>S2</b>  |
| <b>Figure S2</b> One-pot three-component reaction of acetyl acetone, phenacyl bromide and amine derivatives catalyzed by the CS-g-PAN for synthesis of pyrrole derivatives | <b>S2</b>  |
| <b>Figure S3</b> Schematic representation for the preparation of CS-g-PAN nanomaterial ( <b>1</b> ).                                                                       | <b>S2</b>  |
| <b>Figure S4</b> (a) Eenergy-dispersive X-ray spectrum and (b) EDS elemental mapping of CS-g-PAN nanomaterial ( <b>1</b> ) for the distribution of C, N, and O atoms.      | <b>S3</b>  |
| <b>Figure S5</b> FTIR spectra of the CS-g-PAN ( <b>1</b> ), CS, AN and PAN                                                                                                 | <b>S4</b>  |
| <b>Figure S6</b> FESEM images of CS-g-PAN nanomaterial ( <b>1</b> ) (scale bars: 1 $\mu$ m, and 200 and 100 nm)                                                            | <b>S4</b>  |
| <b>Figure S7</b> (a) TGA and (b) DTA curves of the CS-g-PAN nanomaterial ( <b>1</b> ).                                                                                     | <b>S5</b>  |
| <b>Figure S8</b> XRD analysis of the CS-g-PAN nanomaterial ( <b>1</b> )                                                                                                    | <b>S6</b>  |
| <b>Figure S9</b> BET analysis of the CS-g-PAN nanomaterial ( <b>1</b> )                                                                                                    | <b>S6</b>  |
| <b>Figure S10</b> Proposed mechanism for the synthesis of pyrrole derivatives <b>5a-o</b> catalyzed by the CS-g-PAN ( <b>1</b> )                                           | <b>S7</b>  |
| <b>Figure S11</b> Reusability of the recycled CS-g-PAN catalyst ( <b>1</b> ) for the synthesis of pyrrole derivative <b>5a</b> .                                           | <b>S8</b>  |
| <b>Figure S12</b> XRD analysis of the recycled CS-g-PAN ( <b>1</b> ) catalyst after first, third and fifth runs.                                                           | <b>S8</b>  |
| <b>Figure S13</b> <sup>1</sup> H NMR spectra of 1-(4-(4-chlorophenyl)-2-methyl-1-phenyl-1H-pyrrol-3-yl) ethenone                                                           | <b>S9</b>  |
| <b>Figure S14</b> <sup>1</sup> H NMR spectra of 1-(4-(4-chlorophenyl)-2-methyl-1-phenyl-1H-pyrrol-3-yl) ethenone                                                           | <b>S10</b> |

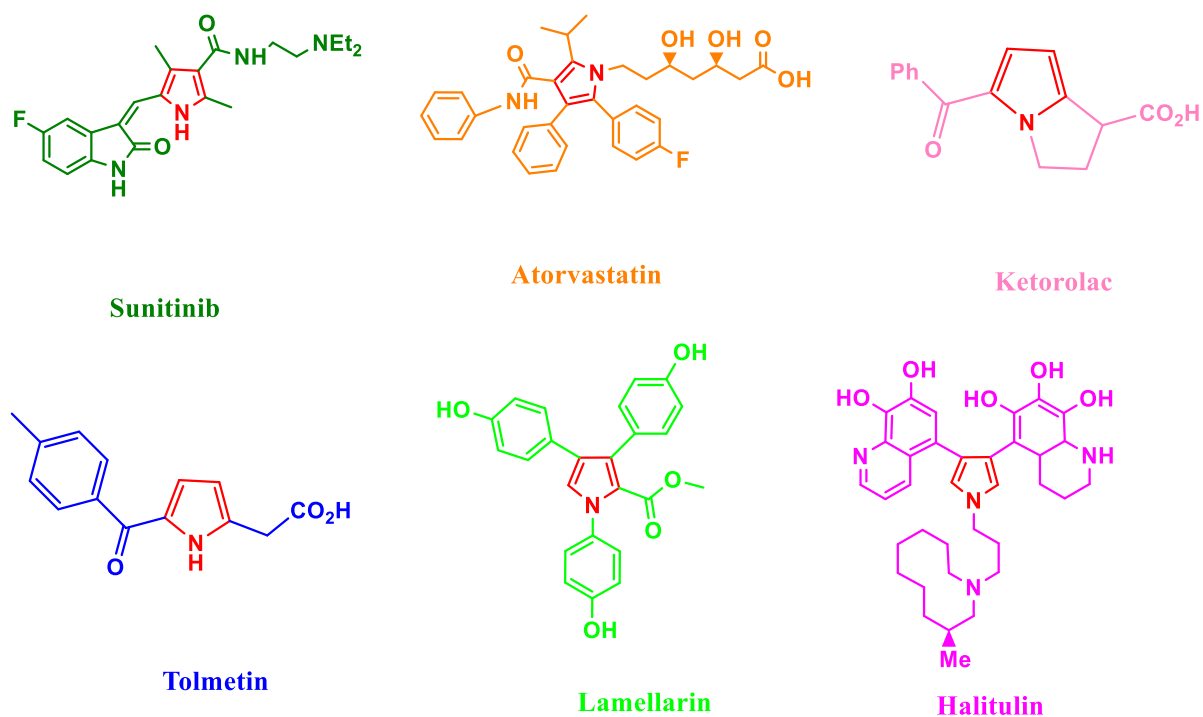

**Fig. S1.** The chemical structure of selected examples of pharmacologically-active pyrrole derivatives.

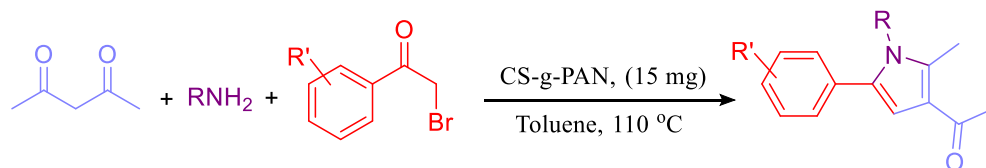

**Fig. S2.** One-pot three-component reaction of acetyl acetone, phenacyl bromide and amine derivatives catalyzed by the CS-g-PAN for synthesis of pyrrole derivatives.

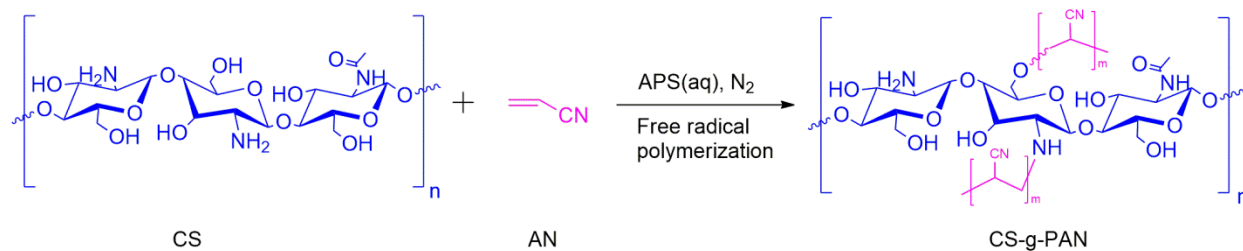

**Fig. S3.** Schematic representation for the preparation of CS-g-PAN nanomaterial (1).

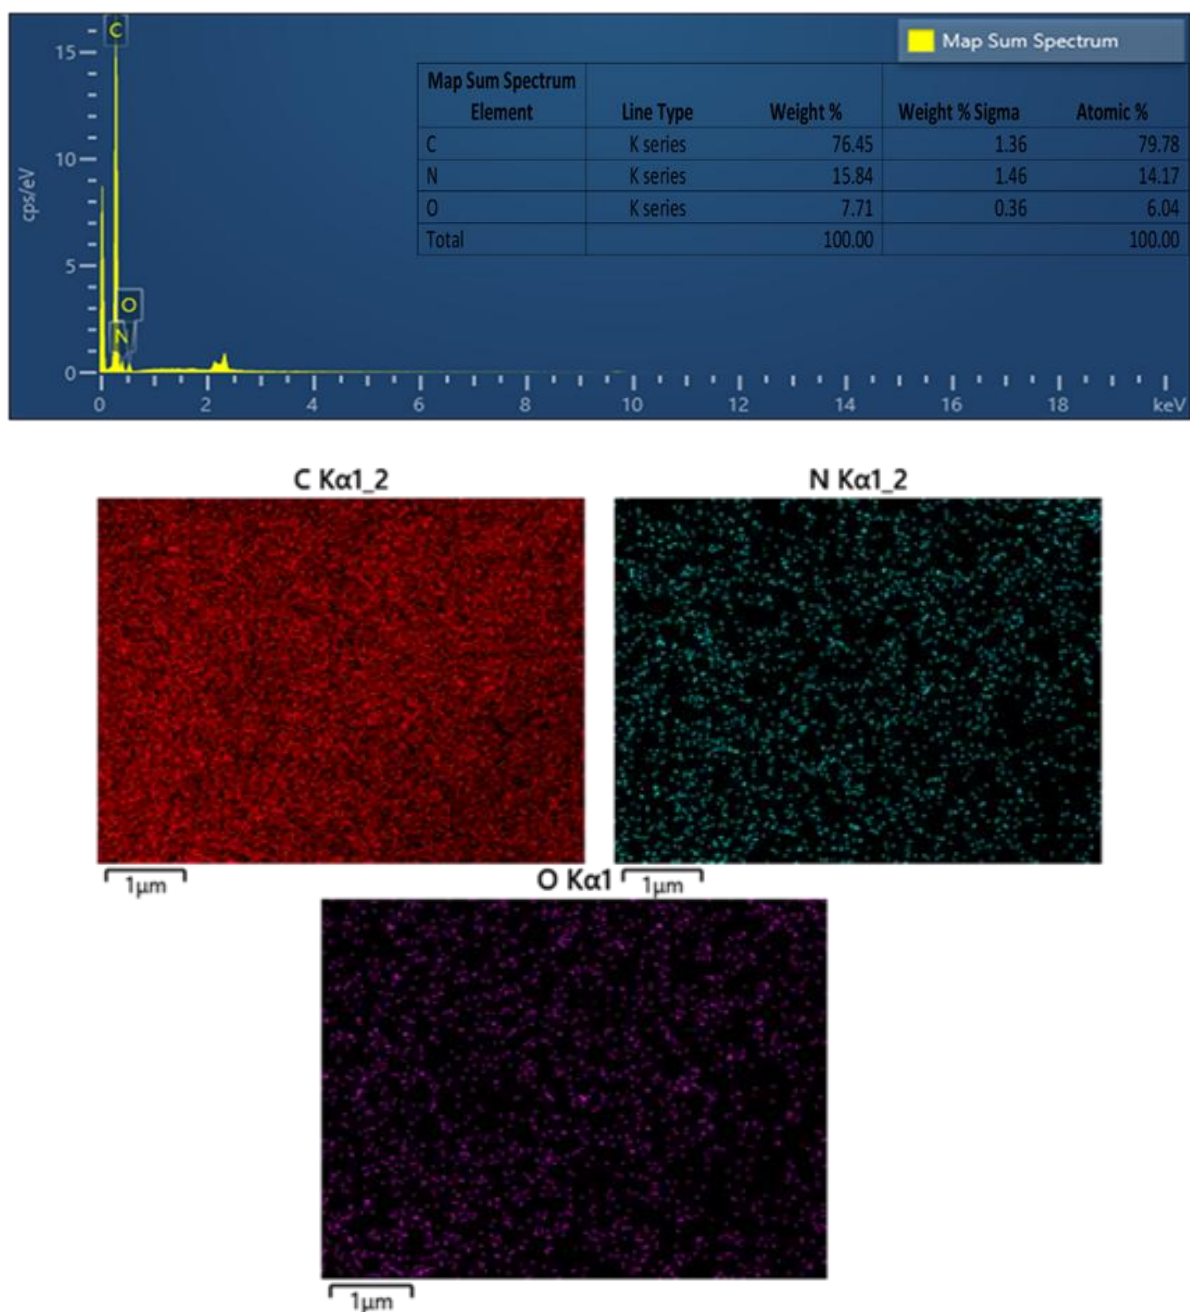

**Fig. S4.** (a) Eenergy-dispersive X-ray spectrum and (b) EDS elemental mapping of CS-g-PAN nanomaterial (1) for the distribution of C, N, and O atoms, respectively.

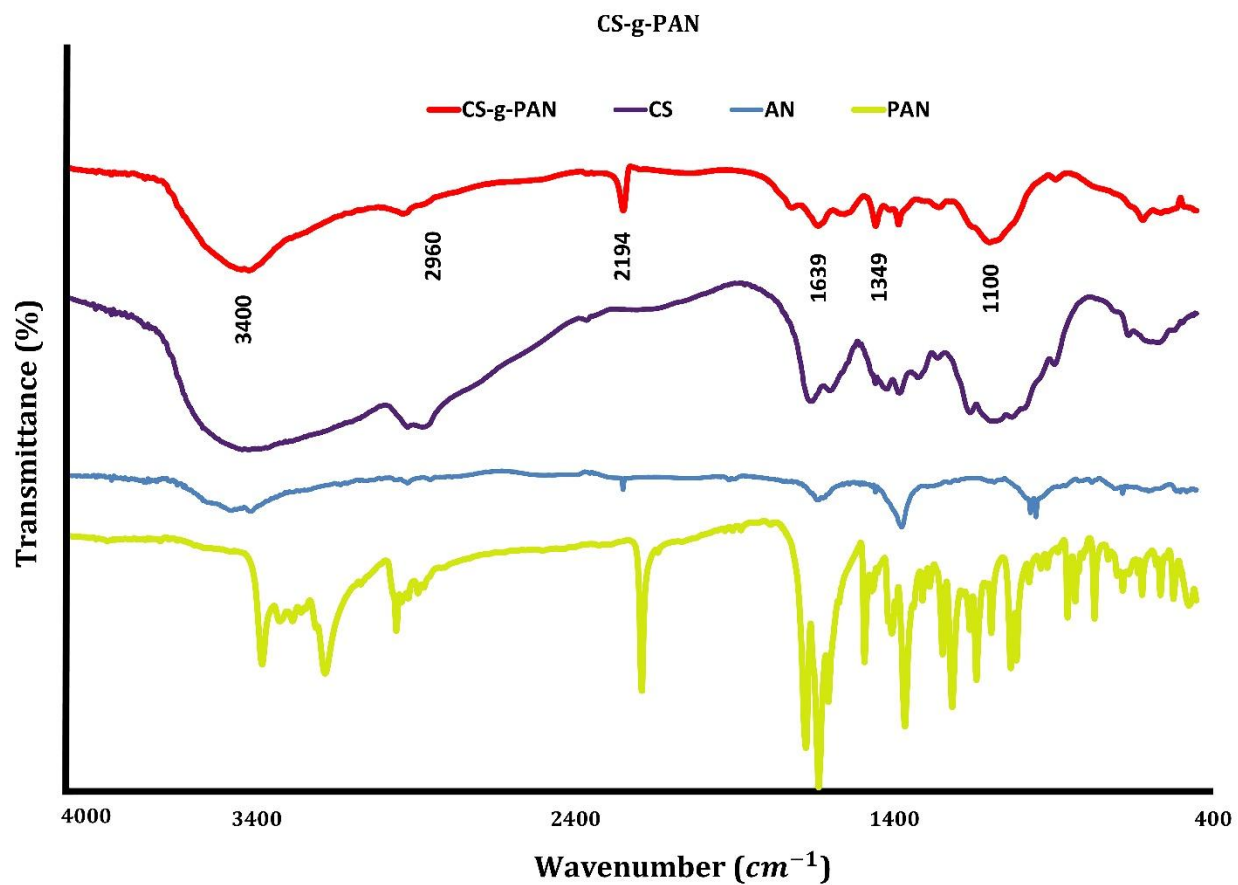

**Fig. S5.** FTIR spectra of the CS-g-PAN (1), CS, AN and PAN.

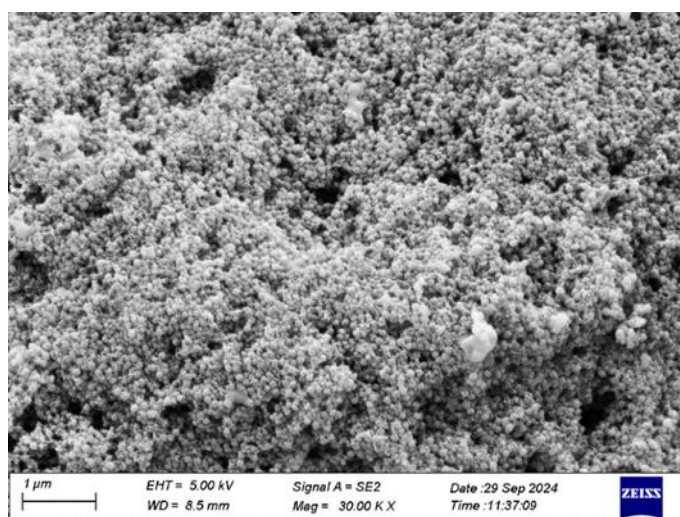

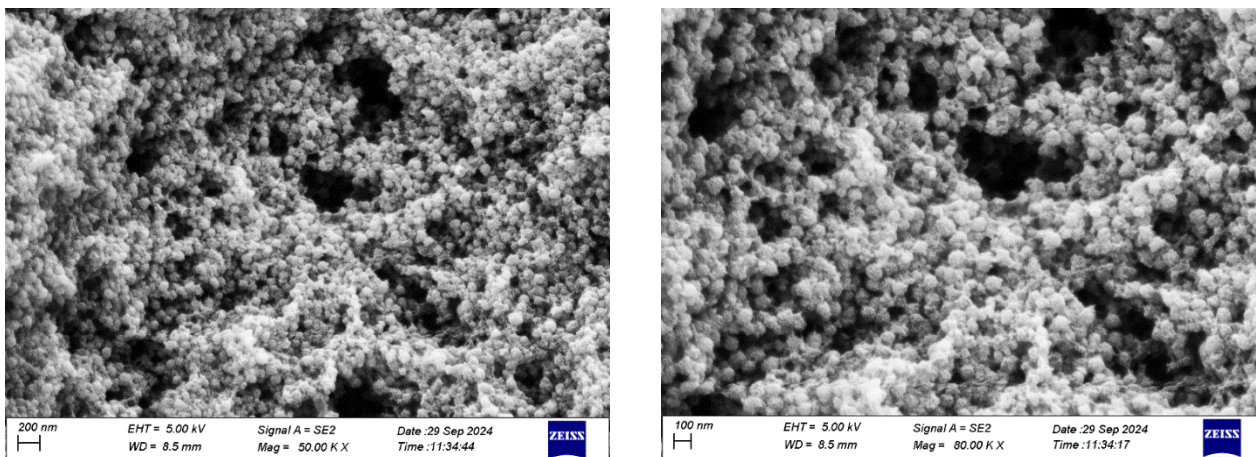

**Fig. S6.** FESEM images of CS-g-PAN nanomaterial (1) (scale bars: 1  $\mu\text{m}$ , and 200 and 100 nm).

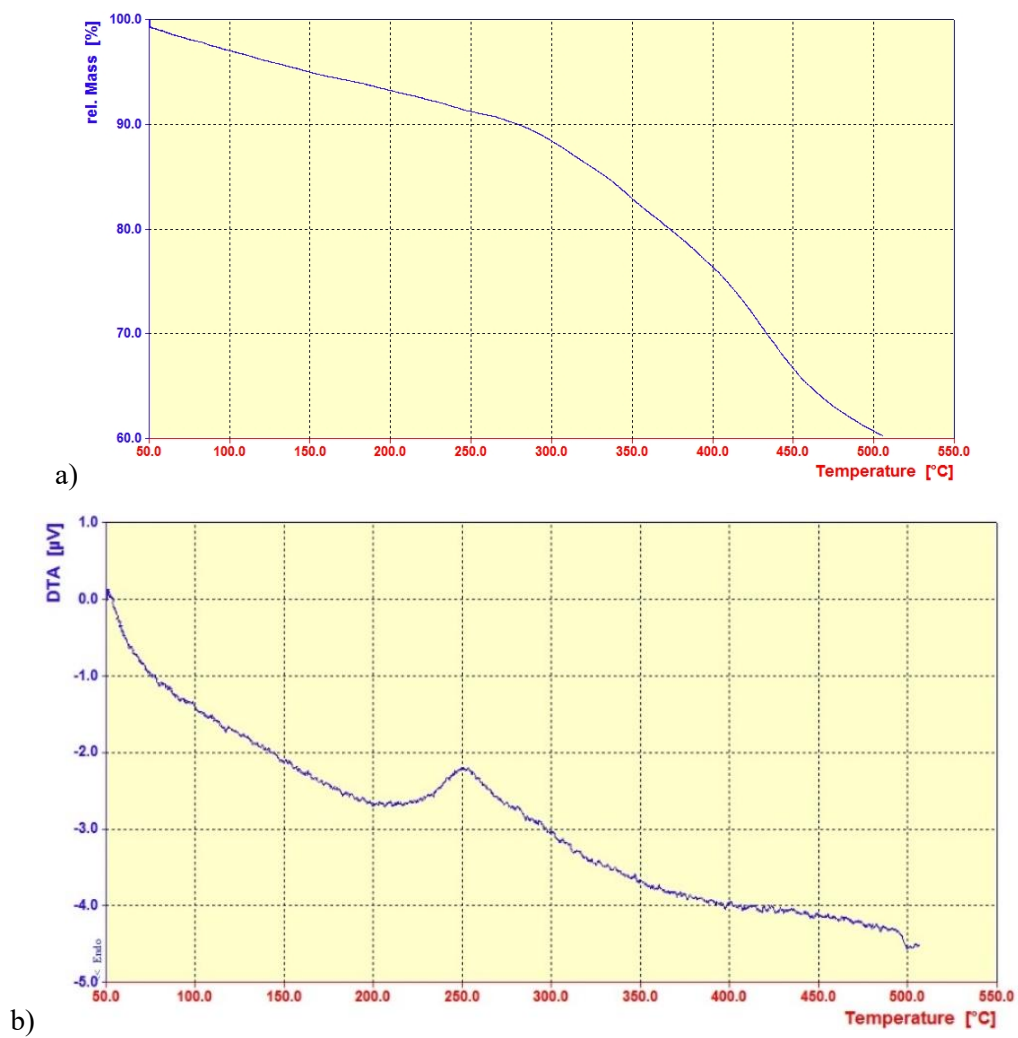

**Fig. S7.** (a) TGA and (b) DTA curves of the CS-g-PAN nanomaterial (1).



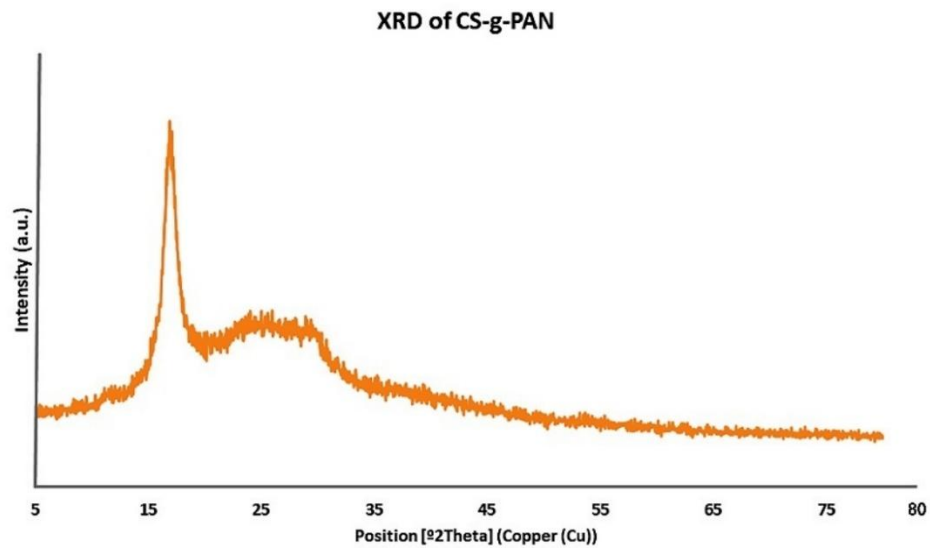

Fig. S8. XRD analysis of the CS-g-PAN nanomaterial (1).

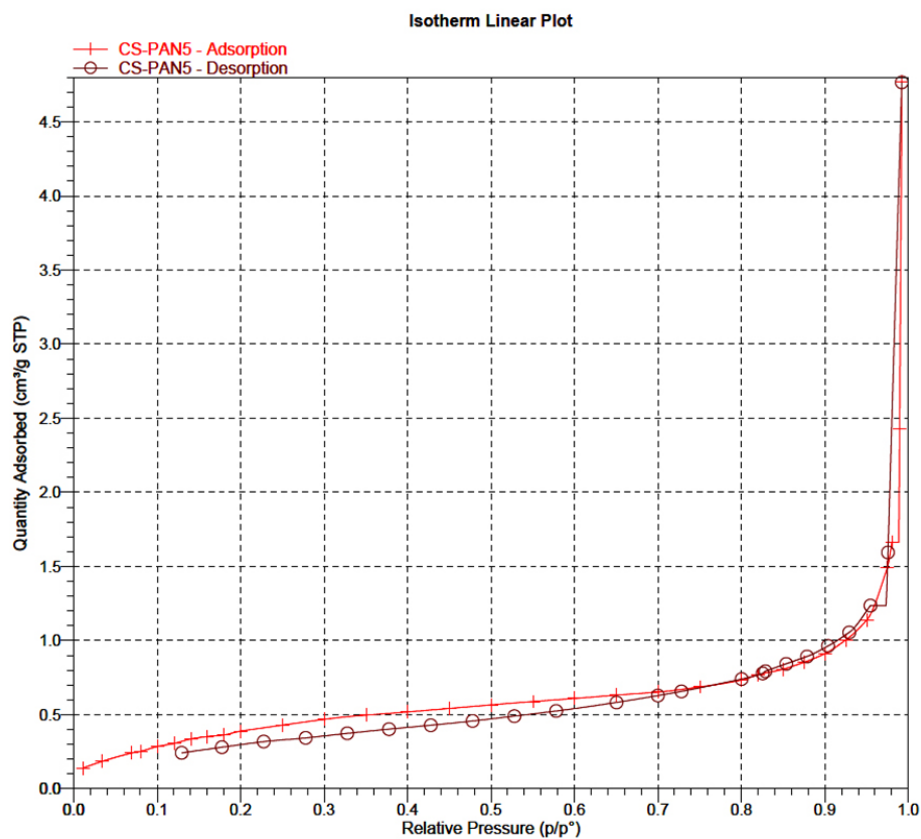

Fig. S9. BET analysis of the CS-g-PAN nanomaterial (1).

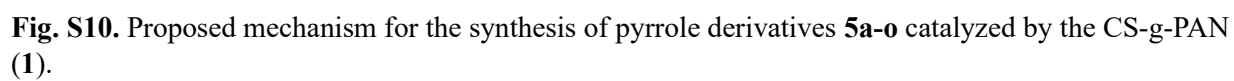

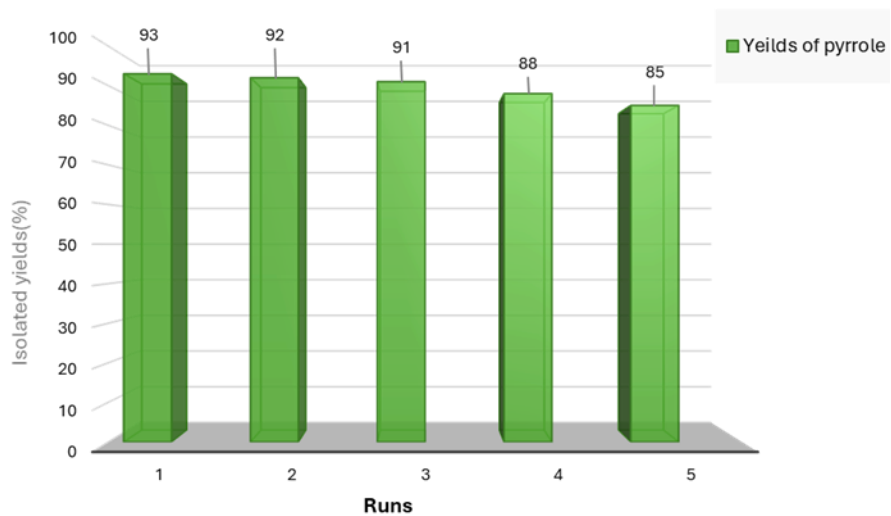

**Fig. S11.** Reusability of the recycled CS-g-PAN (1) for the synthesis of pyrrole derivative **5a**.

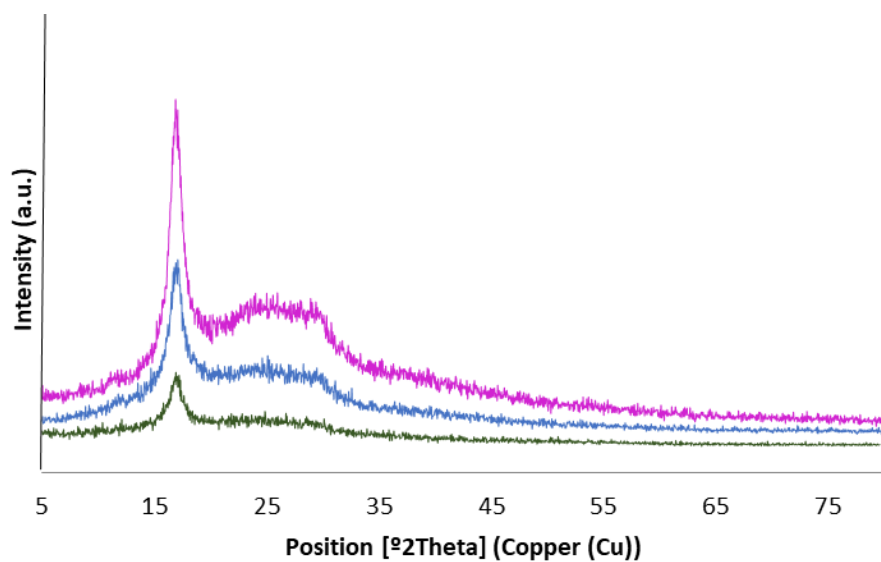

**Fig. S12.** XRD analysis of the recycled CS-g-PAN (1) catalyst after first, third and fifth runs (from top to down).



### Selected Spectral Data:

**1-(1-benzyl-2-methyl-4-phenyl-1*H*-pyrrol-3-yl) ethanone:** Brown solid; M.P = 48 - 50 °C; <sup>1</sup>H NMR (DMSO-*d*<sub>6</sub>, 400 MHz) δ (ppm): 2.74 (s, 3H, CH<sub>3</sub>), 2.82 (s, 3H, CH<sub>3</sub>), 5.31 (s, 2H, CH<sub>2</sub>), 6.62 (s, 1H, CH), 7.26–7.48 (m, 10H).

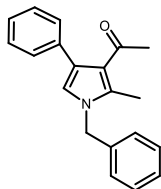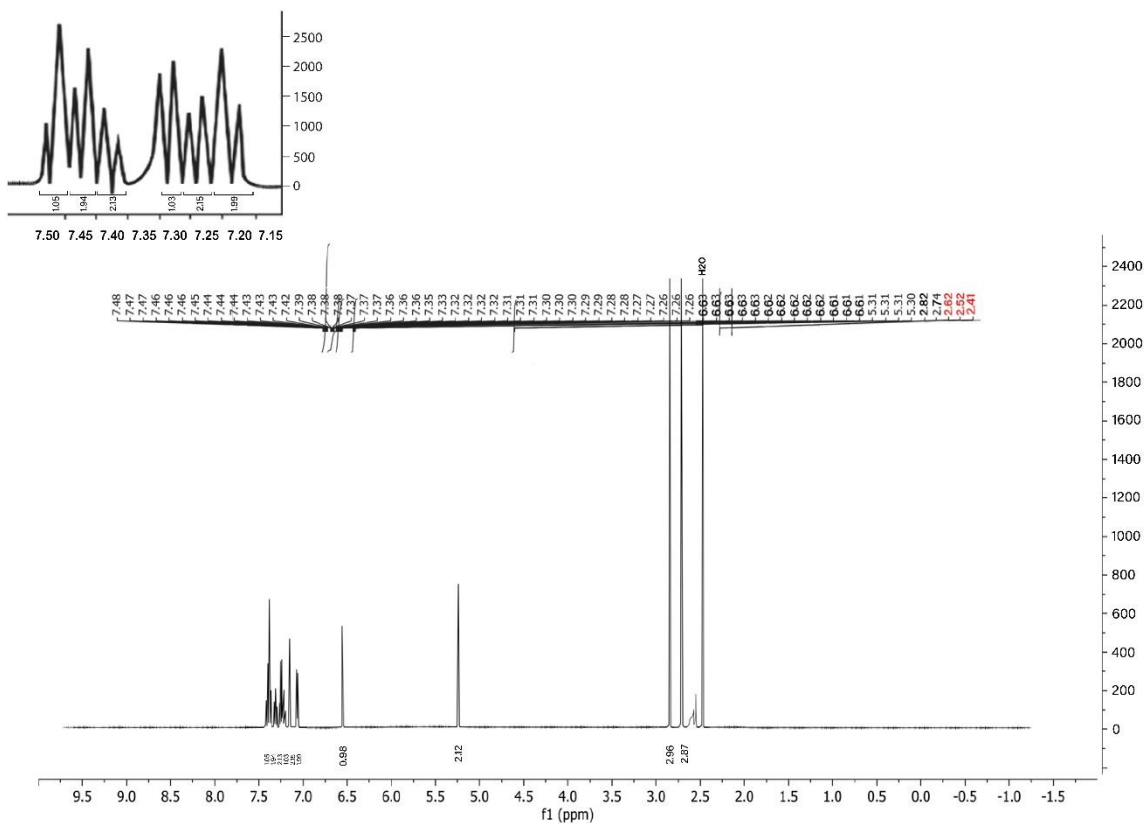

**1-(4-(4-chlorophenyl)-2-methyl-1-phenyl-1H-pyrrol-3-yl) ethanone:** Light brown solid; M.P = 148 - 149 °C;  $^1\text{H}$  NMR (DMSO- $d_6$ , 400 MHz)  $\delta$  (ppm): 2.74 (s, 3H, CH<sub>3</sub>), 2.81 (s, 3H, CH<sub>3</sub>), 6.75 (s, 1, CH), 7.55-7.70 (m, 9H).

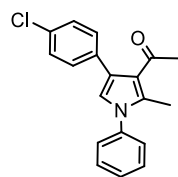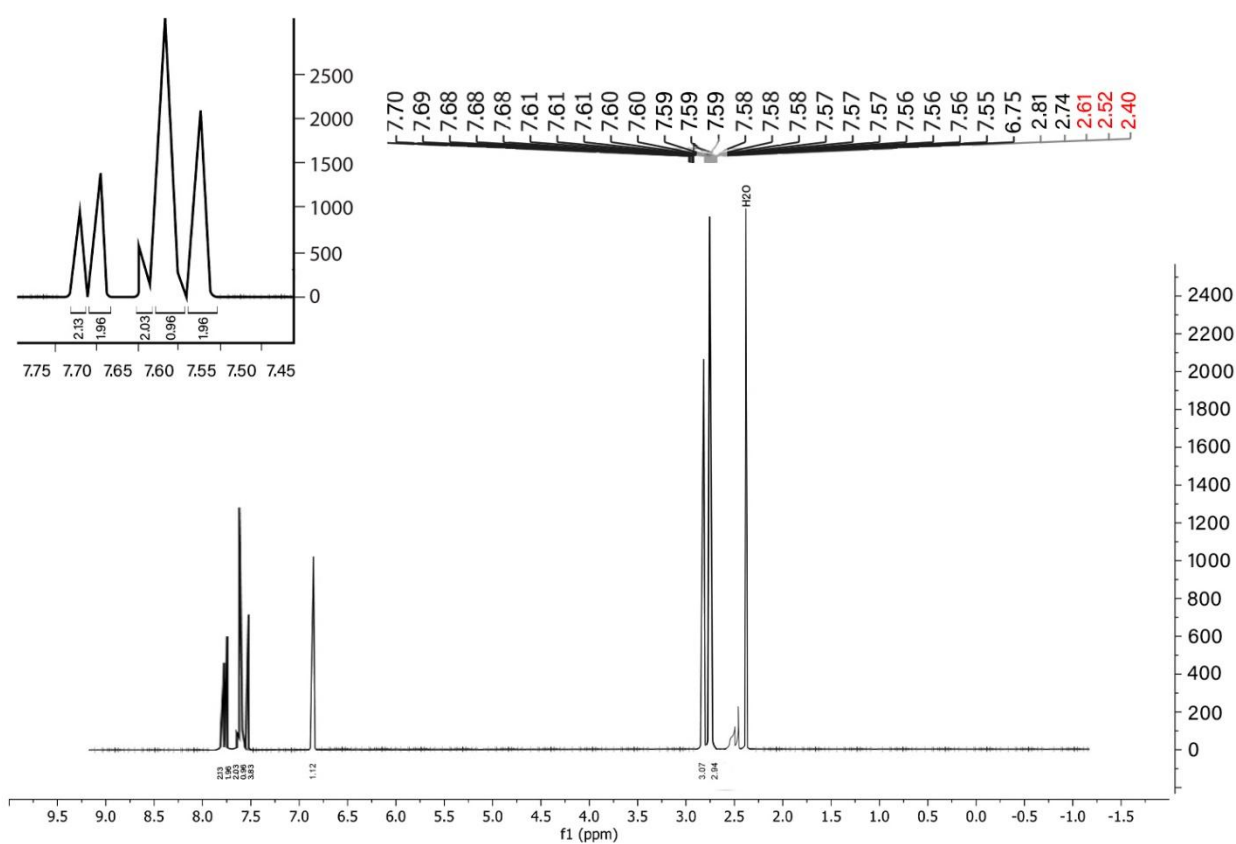

Supplement: Supplementary file 1 [file 3f613cdb36bff2b558fe7fa9.pdf]
